# Supplementary material for: An integrated resource for genome-wide identification and analysis of human tissue-specific differentially methylated regions (tDMRs)
Source: HighWire-hosted journal article supplement (doi:10.1101/gr.077479.108), 2008-06-24
Supplement: Supplementary.pdf [file Supplementary.pdf]

**Supplementary information for “An integrated resource for genome-wide identification and analysis of human tissue-specific differentially methylated regions (tDMRs)” – Rakyan et al.,**

| No. | Tissue          | Biological replicate | Age (y)     | Ethnic Ancestry | array_id | cy3   | cy5   | Baseline | Response | Notes                            |
|-----|-----------------|----------------------|-------------|-----------------|----------|-------|-------|----------|----------|----------------------------------|
| 1   | B-cells         | 1                    | 45          | African         | 76459    | IP    | Input | -0.65    | 17.88    |                                  |
| 2   | B-cells         | 2                    | 40          | European        | 69117    | IP    | Input | -0.48    | 25.55    |                                  |
| 3   | CD4 T-cells     | 1                    | 22          | European        | 66065    | IP    | Input | -0.36    | 24.90    |                                  |
| 4   | CD4 T-cells     | 2                    | 31          | European        | 82857    | IP    | Input | -0.23    | 49.24    |                                  |
| 5   | CD8 T-cells     | 1                    | 41          | European        | 62860    | IP    | Input | -0.58    | 24.55    |                                  |
| 6   | CD8 T-cells     | 1                    | 41          | European        | 78480    | IP    | Input | -0.32    | 40.01    | Technical replicate of sample 5  |
| 7   | CD8 T-cells     | 2                    | 27          | African         | 82312    | IP    | Input | -0.76    | 19.66    |                                  |
| 8   | CD8 T-cells     | 2                    | 27          | African         | 76460    | IP    | Input | -0.62    | 23.75    | Technical replicate of sample 7  |
| 9   | Colon           | 1                    | 37          | European        | 61257    | IP    | Input | -0.45    | 25.30    |                                  |
| 10  | Colon           | 2                    | 38          | European        | 61664    | IP    | Input | -0.49    | 19.76    |                                  |
| 11  | Cervix          | 1                    | 44          | European        | 62870    | Input | IP    | -0.53    | 33.87    |                                  |
| 12  | Cervix          | 2                    | 50          | European        | 75698    | Input | IP    | -0.47    | 26.92    |                                  |
| 13  | Cervix          | 2                    | 50          | European        | 72307    | IP    | Input | -0.49    | 24.38    | Technical replicate of sample 12 |
| 14  | Cervix          | 3                    | 25          | East Asian      | 76454    | IP    | Input | -0.40    | 44.04    |                                  |
| 15  | GM06990         | 1                    | 41          | European        | 86005    | IP    | Input | -0.67    | 15.28    |                                  |
| 16  | GM06990         | 2                    | 41          | European        | 86134    | IP    | Input | -0.62    | 24.08    |                                  |
| 17  | GM06990         | 3                    | 41          | European        | 86136    | IP    | Input | -0.52    | 25.70    |                                  |
| 18  | Lung            | 1                    | 41          | European        | 59181    | IP    | Input | -0.63    | 20.15    |                                  |
| 19  | Lung            | 3                    | 36          | East Asian      | 79060    | IP    | Input | -0.50    | 19.77    |                                  |
| 20  | Liver           | 1                    | 37          | European        | 82843    | IP    | Input | -0.42    | 23.97    |                                  |
| 21  | Liver           | 1                    | 37          | European        | 74196    | Input | IP    | -0.68    | 18.28    | Technical replicate of sample 20 |
| 22  | Liver           | 2                    | 37          | European        | 71622    | IP    | Input | -0.37    | 34.38    |                                  |
| 23  | Liver           | 2                    | 37          | European        | 74212    | Input | IP    | -0.52    | 29.16    | Technical replicate of sample 22 |
| 24  | Liver           | 3                    | 26          | East Asian      | 59504    | IP    | Input | -0.53    | 22.68    |                                  |
| 25  | Placenta        | 1                    | 29 (mother) | European        | 83032    | IP    | Input | -0.34    | 42.38    |                                  |
| 26  | Placenta        | 2                    | 31 (mother) | European        | 79812    | Input | IP    | -0.32    | 47.85    |                                  |
| 27  | Placenta        | 2                    | 31 (mother) | European        | 81192    | IP    | Input | -0.24    | 49.11    | Technical replicate of sample 26 |
| 28  | Placenta        | 3                    | unknown     | East Asian      | 83895    | IP    | Input | -0.34    | 37.51    |                                  |
| 29  | Prostate        | 1                    | 51          | European        | 71742    | IP    | Input | -0.47    | 28.31    |                                  |
| 30  | Prostate        | 2                    | 46          | European        | 77241    | Input | IP    | -0.41    | 35.40    |                                  |
| 31  | Prostate        | 2                    | 46          | European        | 71738    | IP    | Input | -0.28    | 39.02    | Technical replicate of sample 30 |
| 32  | Pancreas        | 1                    | 37          | European        | 79036    | IP    | Input | -0.44    | 24.25    |                                  |
| 33  | Pancreas        | 2                    | 37          | European        | 76450    | Input | IP    | -0.53    | 16.89    |                                  |
| 34  | Pancreas        | 2                    | 37          | European        | 82148    | IP    | Input | -0.39    | 25.68    | Technical replicate of sample 33 |
| 35  | Pancreas        | 3                    | 33          | East Asian      | 83896    | IP    | Input | -0.27    | 40.00    |                                  |
| 36  | Rectum          | 1                    | 43          | European        | 61631    | IP    | Input | -0.52    | 35.50    |                                  |
| 37  | Rectum          | 2                    | 37          | European        | 61622    | IP    | Input | -0.57    | 21.14    |                                  |
| 38  | Skeletal Muscle | 1                    | 37          | European        | 74213    | Input | IP    | -0.67    | 25.88    |                                  |
| 39  | Skeletal Muscle | 2                    | 41          | European        | 72308    | IP    | Input | -0.51    | 31.77    |                                  |
| 40  | Skeletal Muscle | 3                    | 26          | East Asian      | 83891    | IP    | Input | -0.41    | 37.22    |                                  |
| 41  | Sperm           | 1                    | 20-49       | European        | 61246    | IP    | Input | -0.58    | 24.64    |                                  |
| 42  | Sperm           | 2                    | 20-49       | European        | 78923    | IP    | Input | -0.39    | 23.20    |                                  |
| 43  | Sperm           | 3                    | 20-49       | European        | 83890    | IP    | Input | -0.21    | 41.53    |                                  |
| 44  | Sperm           | 4                    | 20-49       | European        | 98489    | Input | IP    | -0.34    | 28.53    |                                  |
| 45  | Uterus          | 1                    | 38          | European        | 71619    | IP    | Input | -0.34    | 35.11    |                                  |
| 46  | Uterus          | 1                    | 38          | European        | 76451    | Input | IP    | -0.35    | 26.79    | Technical replicate of sample 45 |
| 47  | Uterus          | 2                    | 41          | European        | 82533    | IP    | Input | -0.24    | 14.56    |                                  |
| 48  | Uterus          | 2                    | 41          | European        | 76452    | Input | IP    | -0.41    | 25.27    | Technical replicate of sample 47 |
| 49  | Uterus          | 3                    | 39          | East Asian      | 82058    | IP    | Input | -0.58    | 19.91    |                                  |
| 50  | Whole Blood     | 1                    | 26          | European        | 76457    | IP    | Input | -0.61    | 25.59    |                                  |
| 51  | Whole Blood     | 3                    | 44          | East Asian      | 98131    | Input | IP    | -0.57    | 23.84    |                                  |

**Supplementary Table 1.** Tissue samples used in the study. The "Baseline" and "Response" parameters refer, respectively, to the intercept and inverse slope of a linear model fitted to the low-CpG portion of each array's data (refer to description of Batman). The "Response" parameter can be interpreted as the number of methylated cytosines in a region required to increase the observed array signal by one unit. Since the noise level of the arrays appears to be fairly uniform, this can be interpreted as a measure of the signal/noise ratio of the complete MeDIP-chip experiment. Data for the sperm samples have been previously described in Down et al., (in press).

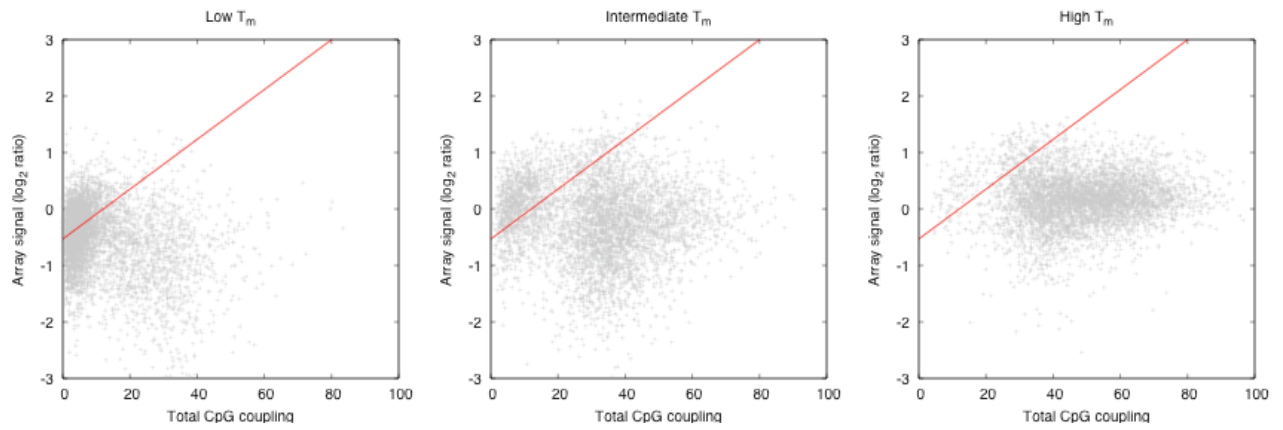

**Supplementary Figure 1.** MeDIP-array data plotted against a measure of CpG density in the neighbourhood of the probe. Probes were sub-divided into three equal-sized sets according to probe melting temperatures calculated using Nimblegen's method ([www.nimblegen.com](http://www.nimblegen.com)). The red line shows the Batman calibration used for the complete dataset. As expected, most of the high  $T_m$  probes are in high-CpG regions. However, in regions of lower CpG density, the three populations of probes are similar, and in particular the linear model seems to fit all three populations reasonably well.

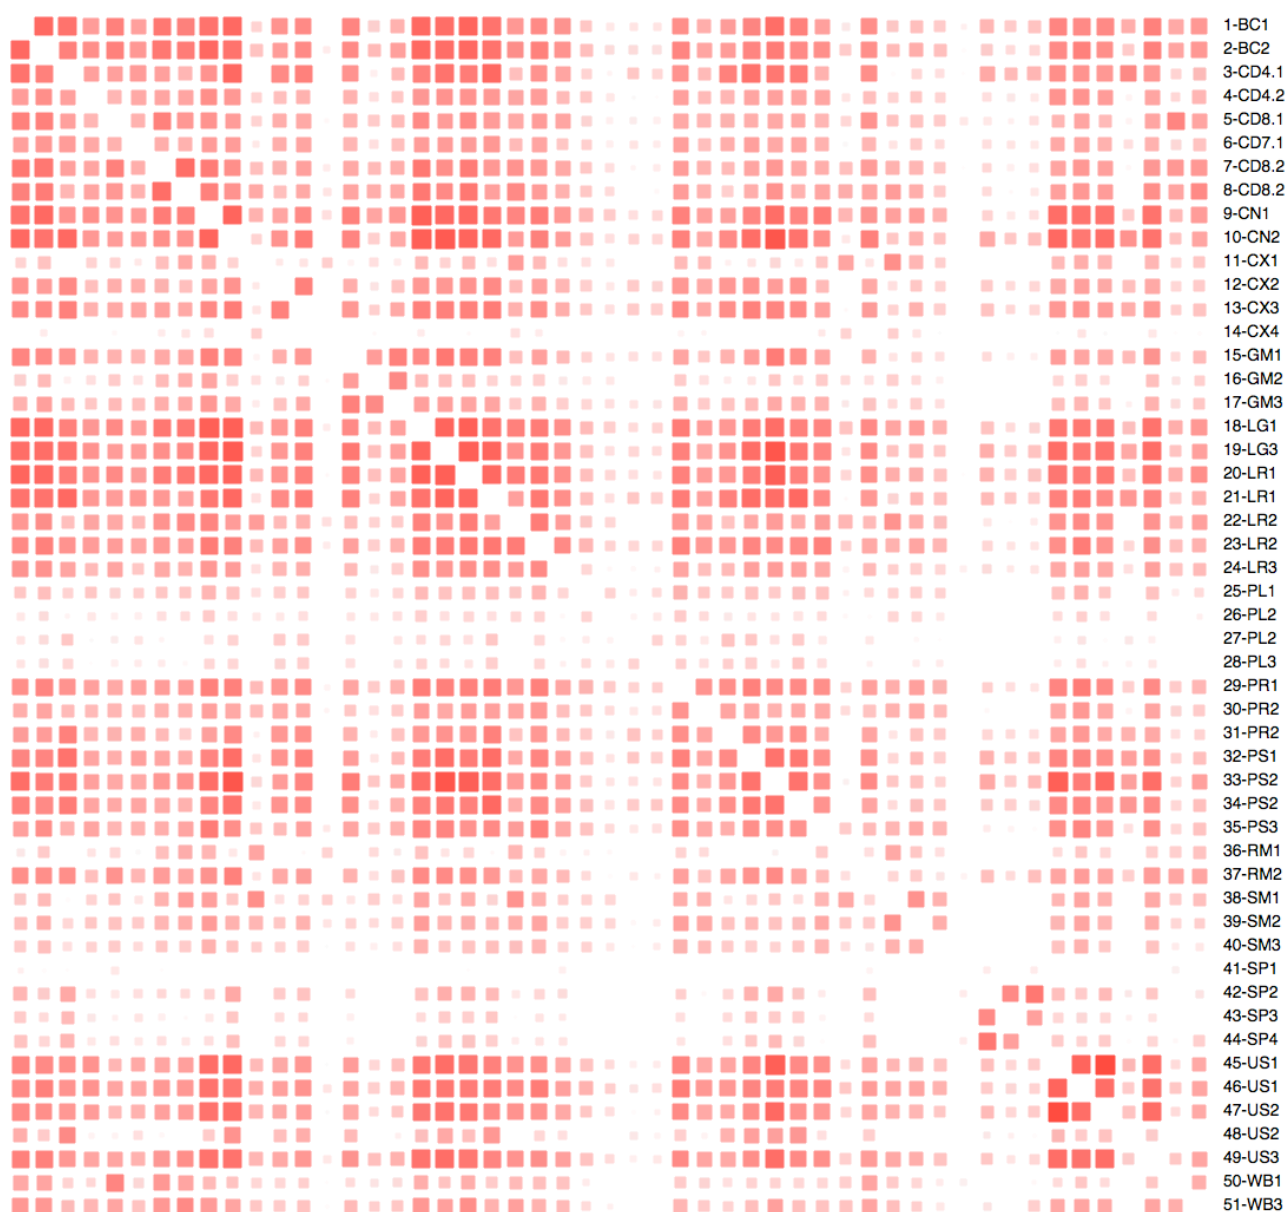

**Supplementary Figure 2.** Correlation coefficients between the 51 MeDIP-chip microarrays used in this study. Each array was analysed individually using the Batman method. Area of squares reflects the correlation coefficient ( $r$ ) with an empty square indicating  $r \leq 0.65$  and a full square indicating  $r = 1.0$ . The overall correlation between arrays is high (with the great majority of pairwise comparisons showing  $r > 0.65$ ), indicating a strong methylation pattern in common between most tissues. Some arrays show lower overall correlation than others: we believe that this reflects a slightly lower signal to noise ratio from these arrays, and note that it often corresponds with a relatively high Response parameter (see Sup. Table 1 and Sup. methods).

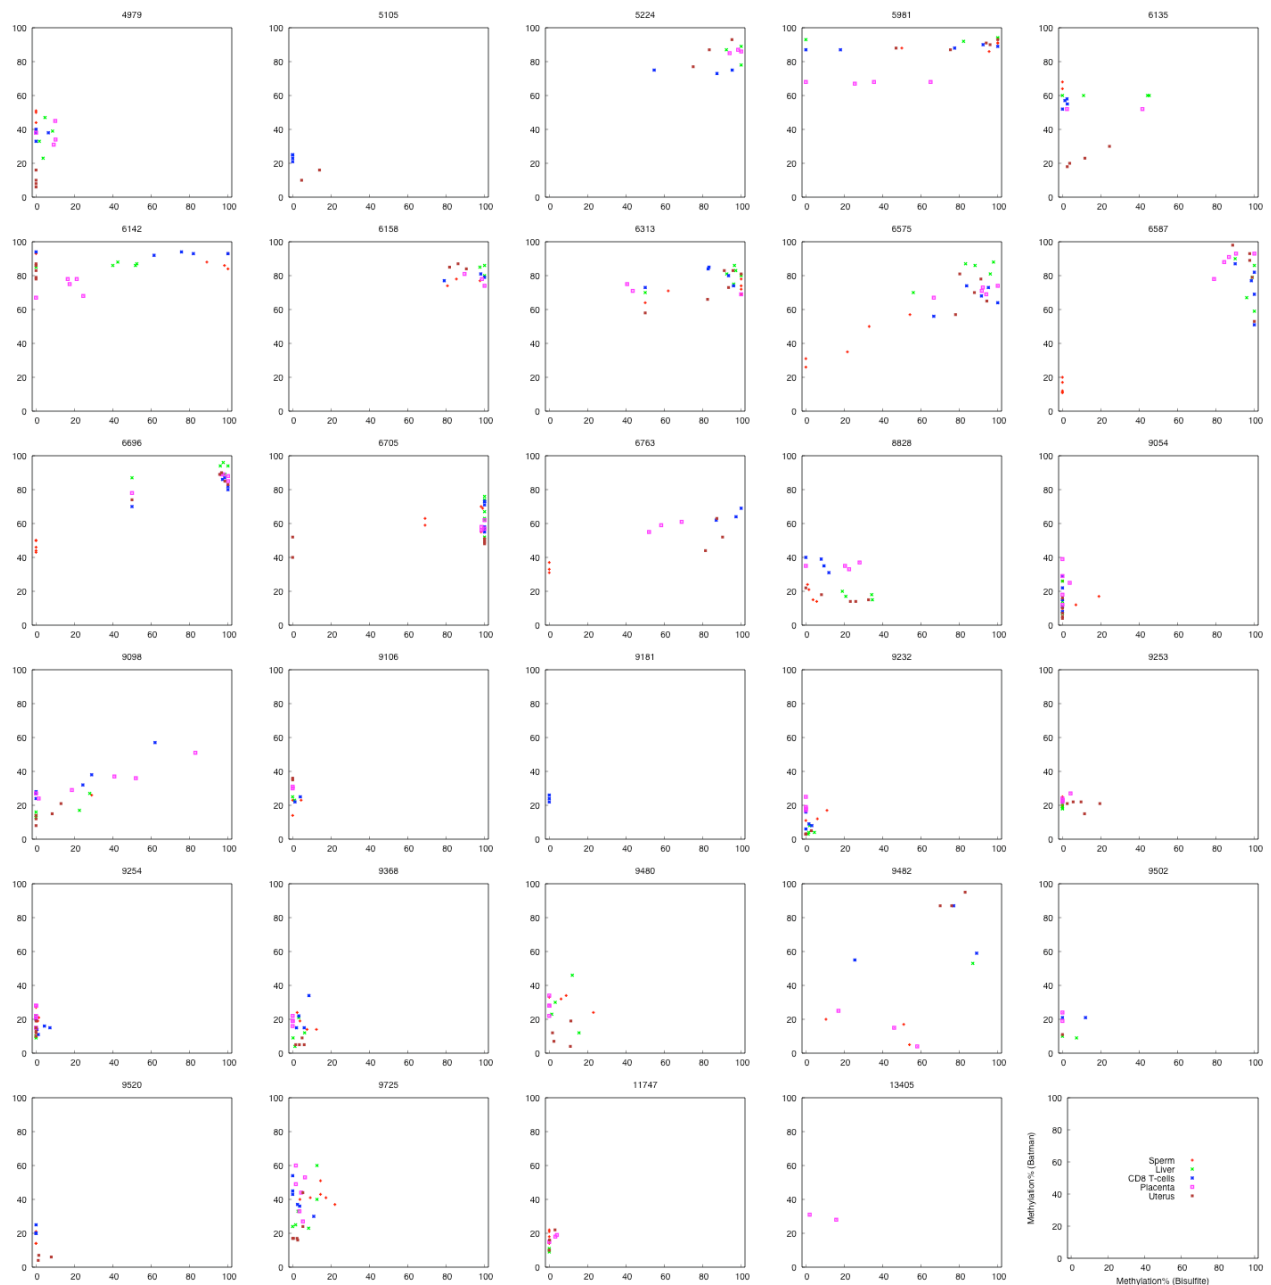

**Supplementary Figure 3.** Bisulfite-PCR validation of the Batman calls. Initially, 36 regions were chosen for bisulfite-PCR validation, spanning a range of CpG densities, genomic locations, tDMRs and non-tDMRs (see Supplementary Table 2). However, PCR products could be obtained for only 29. The validation was performed for each of the same tissue samples analyzed on the arrays, resulting in >1,000 individual bisulfite-PCR sequences. For the sake of clarity, only 5 tissues are shown here. The bisulfite-PCR was performed as described previously<sup>1</sup>, and then averaged across 100 bp tiles. DNA methylation data for the biological replicates for each tissue type were averaged. We classified both the bisulfite-PCR and Batman-called array data as unmethylated (< 40%) or methylated (> 60%). Based on this classification, only ROIs 5981 and 6142, are discordant between the bisulfite and array datasets.

**Supplementary Table 2.** Regions analyzed in Supplementary Figure 1.

| no. | Bisulfite-PCR<br>amplicon ID | Chr | Amplicon<br>start | Amplicon<br>end | GC% | CpG% | Array<br>ROI id | ROI start   | ROI end     |
|-----|------------------------------|-----|-------------------|-----------------|-----|------|-----------------|-------------|-------------|
| 1   | 4979                         | 22  | 29,938,315        | 29,938,715      | 67  | 6.2  | 27086           | 29,938,018  | 29,938,968  |
| 2   | 5105                         | 22  | 17,545,712        | 17,546,102      | 77  | 11.8 | 26738           | 17,545,145  | 17,547,059  |
| 3   | 5224                         | 22  | 20,130,777        | 20,131,135      | 64  | 6.7  | 26831           | 20,130,463  | 20,131,012  |
| 4   | 5981                         | 22  | 38,296,618        | 38,297,072      | 67  | 3.5  | 27317           | 38,296,495  | 38,297,444  |
| 5   | 6135                         | 22  | 35,970,069        | 35,970,424      | 67  | 4.5  | 27195           | 35,970,040  | 35,970,489  |
| 6   | 6142                         | 22  | 35,938,425        | 35,938,903      | 67  | 3.8  | 27194           | 35,938,422  | 35,938,871  |
| 7   | 6158                         | 22  | 49,216,499        | 49,216,926      | 61  | 4.9  | 27675           | 49,216,545  | 49,216,794  |
| 8   | 6313                         | 22  | 18,510,668        | 18,511,158      | 70  | 8.4  | 26780           | 18,510,402  | 18,511,251  |
| 9   | 6575                         | 22  | 49,334,595        | 49,335,038      | 67  | 7.4  | 27696           | 49,333,374  | 49,335,023  |
| 10  | 6587                         | 22  | 29,281,454        | 29,281,947      | 63  | 8.3  | 27059           | 29,280,934  | 29,282,083  |
| 11  | 6696                         | 22  | 41,419,027        | 41,419,524      | 66  | 8.2  | 27422           | 41,418,869  | 41,419,618  |
| 12  | 6705                         | 22  | 45,453,093        | 45,453,592      | 59  | 5.6  | 27559           | 45,453,377  | 45,453,526  |
| 13  | 6763                         | 22  | 39,964,476        | 39,964,879      | 70  | 6.4  | 27354           | 39,963,565  | 39,964,753  |
| 14  | 8828                         | 6   | 101,018,918       | 101,019,406     | 64  | 6.5  | 34354           | 101,018,058 | 101,020,107 |
| 15  | 9054                         | 6   | 139,136,417       | 139,136,888     | 60  | 5.3  | 34696           | 139,136,090 | 139,137,339 |
| 16  | 9098                         | 6   | 46,811,222        | 46,811,720      | 51  | 3.8  | 34024           | 46,810,546  | 46,811,795  |
| 17  | 9106                         | 6   | 53,322,056        | 53,322,372      | 42  | 2.5  | 34096           | 53,320,630  | 53,322,579  |
| 18  | 9181                         | 6   | 150,963,434       | 150,963,699     | 64  | 9.8  | 34785           | 150,962,740 | 150,963,841 |
| 19  | 9232                         | 6   | 28,475,339        | 28,475,830      | 59  | 6.3  | 33702           | 28,475,166  | 28,475,915  |
| 20  | 9253                         | 6   | 126,111,195       | 126,111,673     | 53  | 4.8  | 34567           | 126,110,449 | 126,113,315 |
| 21  | 9254                         | 6   | 153,346,203       | 153,346,693     | 70  | 8.0  | 34814           | 153,345,105 | 153,346,654 |
| 22  | 9368                         | 6   | 170,735,558       | 170,735,982     | 51  | 3.4  | 35053           | 170,735,258 | 170,736,107 |
| 23  | 9480                         | 6   | 33,787,387        | 33,787,734      | 63  | 8.9  | 33720           | 33,787,126  | 33,787,975  |
| 24  | 9482                         | 6   | 54,281,191        | 54,281,533      | 41  | 1.2  | 34106           | 54,280,991  | 54,282,009  |
| 25  | 9502                         | 6   | 154,872,494       | 154,872,915     | 67  | 6.9  | 34823           | 154,872,350 | 154,873,838 |
| 26  | 9520                         | 6   | 76,368,619        | 76,368,942      | 74  | 13.0 | 34204           | 76,367,741  | 76,369,717  |
| 27  | 9725                         | 6   | 37,774,253        | 37,774,700      | 68  | 8.3  | 33827           | 37,774,107  | 37,775,056  |
| 28  | 11747                        | 20  | 2,801,490         | 2,801,889       | 57  | 4.3  | 24947           | 2,800,957   | 2,802,966   |
| 29  | 13405                        | 22  | 35,777,451        | 35,777,920      | 73  | 10.6 | 27183           | 35,777,329  | 35,778,352  |

All co-ordinates are based on the NCBI36 version of the human genome

Primer sequences are available upon request

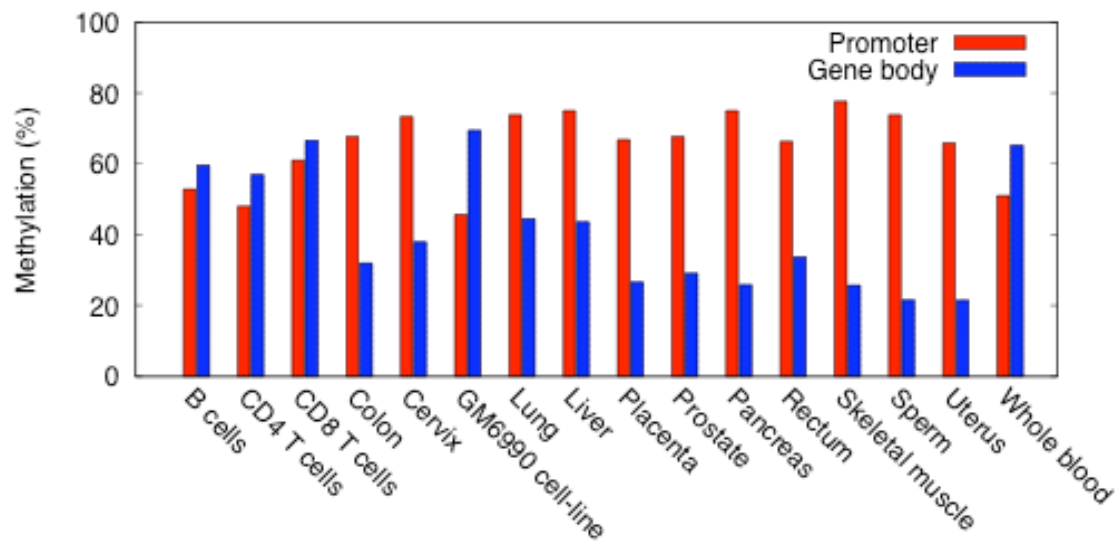

**Supplementary Figure 4.** DNA methylation status of the ICAM3 gene in a panel of tissues. Promoter methylation bars are based on a 500bp region upstream of the transcription start site (as annotated in Ensembl), while gene body bars show the mean of all available exonic and intronic data from the second exon onwards.

**A**

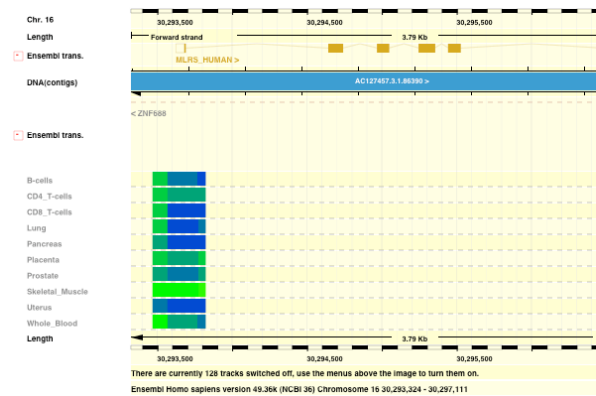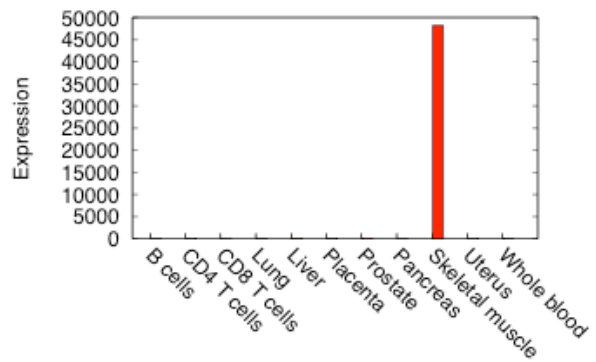

**B**

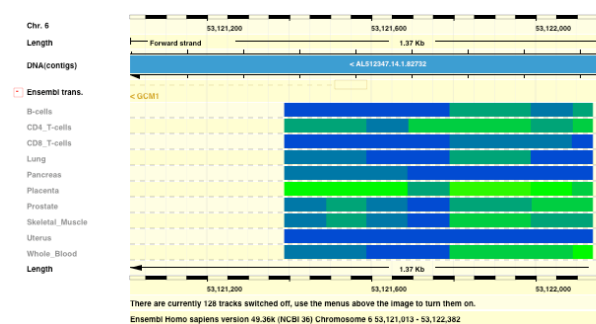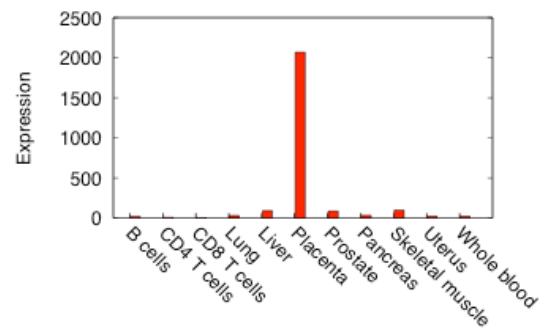

**Supplementary Figure 5.** Promoter DNA methylation and expression patterns for two tissue-specific genes. Gene expression data was plotted as in figure 2c. Expression data are from Su et al., (2004).

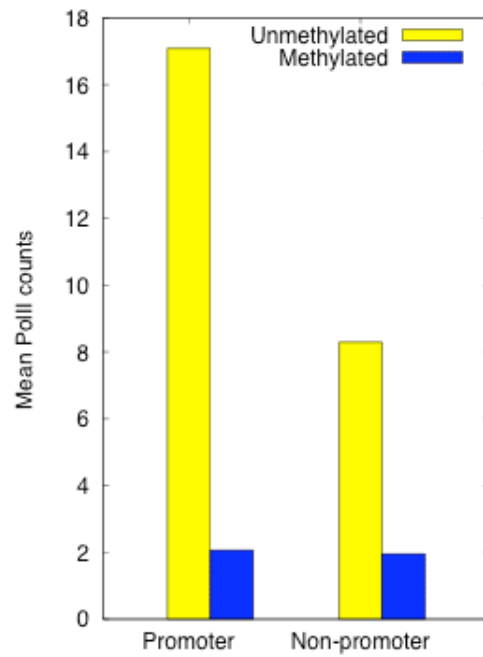

**Supplementary Figure 6.** DNA methylation data for promoter and non-promoter CpG islands from our study was correlated with genome-wide enrichment profiles RNA PolII generated by Barski et al., 2007 (ref. 2) using Solexa 1G sequencing technology. The y-axis DNA represents the average tag count for RNA PolII. Yellow is < 40% methylation and blue is >60% methylation.



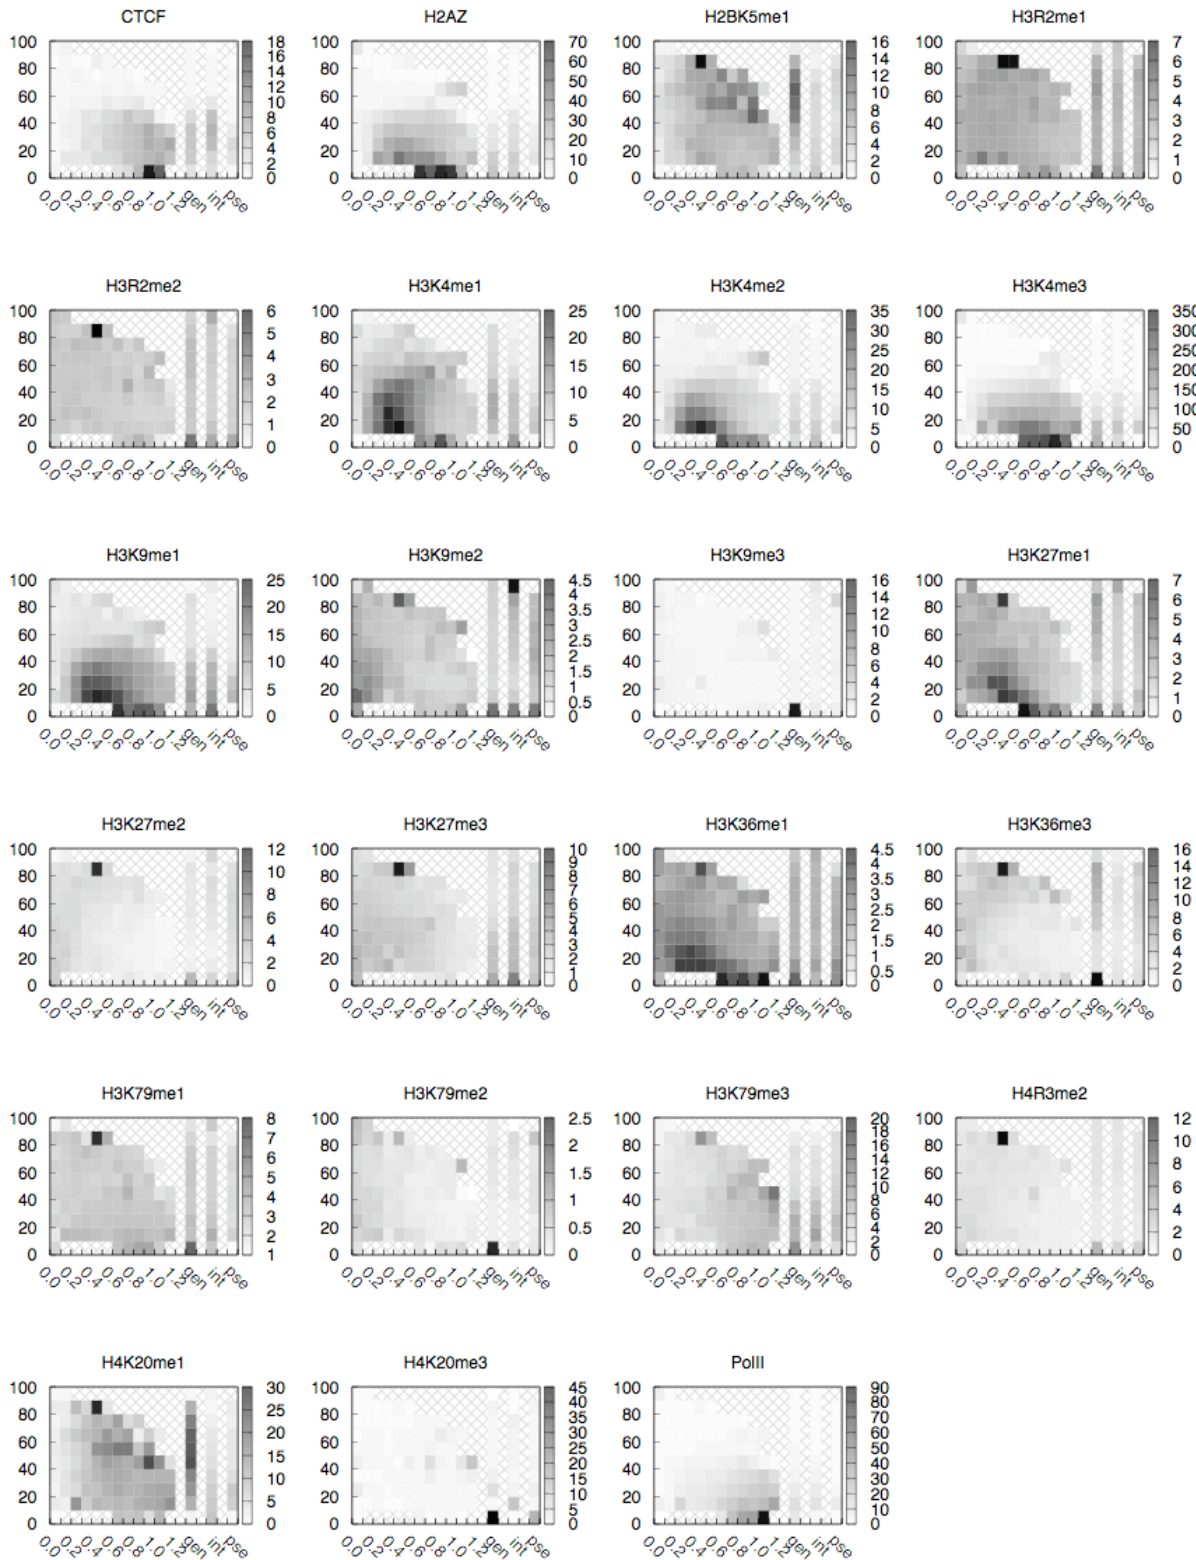

**Supplementary Figure 7.** DNA methylation data from our study was correlated with genome-wide enrichment profiles for 20 histone lysine and arginine methylations, H2A.Z, RNA PolII, and CTCF generated by Barski et al., 2007 (ref. 2) using Solexa 1G sequencing technology. The x-axes represent CpG<sub>0/e</sub> (there were insufficient data to stratify by CpG<sub>0/e</sub> in the non-promoter categories), the y-axes DNA methylation levels, and the grey-scale represents the average tag count for the histone modification or protein indicated. The exon and intron categories were combined into a single ‘genic’ category. Hatched regions indicate insufficient data were available.

**Supplementary Table 3.** Tissue-specific differentially methylated regions (tDMRs) were called in 500bp ROIs. To identify hypermethylated tDMRs in a given tissue, we looked for ROIs with a mean methylation of > 60% in the target tissues and < 40% in at least three somatic tissues (not including sperm, placenta, or cell line). Similarly, to identify hypomethylated tDMRs, we looked for ROIs with methylation <40% in the target tissue and > 60% in at least 3 somatic tissues.

|                 | hypo-<br>methylated<br>tDMRs | hyper-<br>methylated<br>tDMRs |
|-----------------|------------------------------|-------------------------------|
| B-cells         | 613                          | 531                           |
| CD4 T-cells     | 725                          | 328                           |
| CD8 T-cells     | 555                          | 908                           |
| Colon           | 579                          | 392                           |
| cervix          | 473                          | 593                           |
| GM06990 cells   | 1278                         | 1667                          |
| Lung            | 439                          | 472                           |
| Liver           | 520                          | 670                           |
| Placenta        | 731                          | 1192                          |
| Prostate        | 522                          | 512                           |
| Pancreas        | 922                          | 576                           |
| Rectum          | 676                          | 554                           |
| Skeletal Muscle | 625                          | 1236                          |
| Sperm           | 4348                         | 1030                          |
| Uterues         | 1822                         | 1094                          |
| Whole Blood     | 739                          | 861                           |

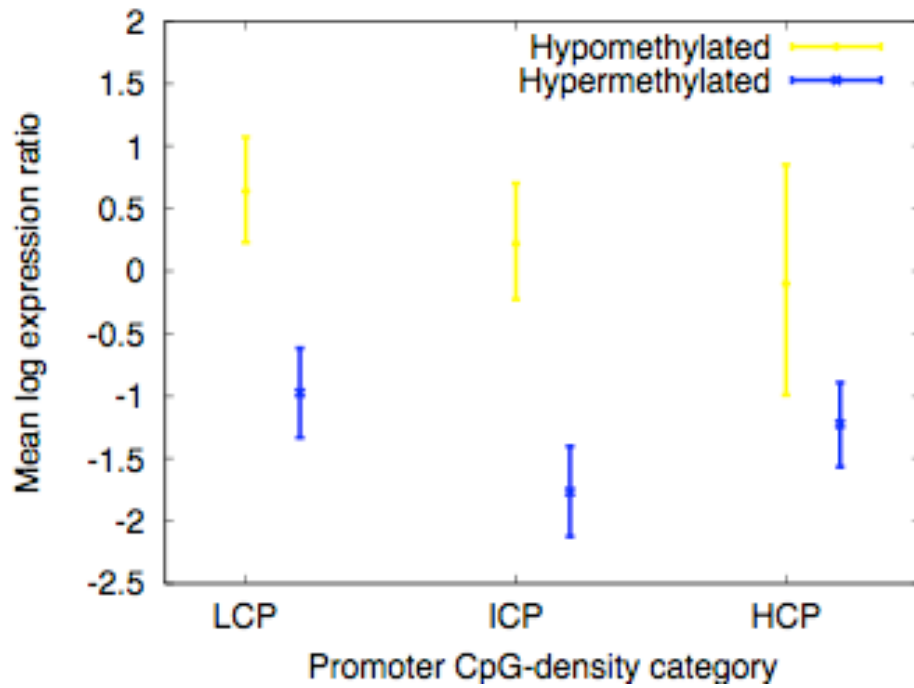

**Supplementary Figure 8.** Comparison of tissue-specific DNA methylation and gene expression using a promoter classification similar to that previously used by Schubeler and colleagues<sup>2</sup>. ‘Promoters’ were defined as a 2,400 bp region centered on the TSS annotated in the Ensembl genome browser. High CpG density promoters (HCP) were defined as having at least one 500 bp window with  $\text{CpG}_{\text{o/e}} > 0.75$  and  $\text{GC}\% > 55\%$ . Low CpG density promoters (LCP) were defined as having no 500 bp windows with  $\text{CpG}_{\text{o/e}} > 0.48$  and  $\text{GC}\% > 55\%$ . All other promoters were classified as intermediate CpG density promoters (ICP). The figure shows a comparison of promoter-tDMR (located anywhere within 1.2 kb of the TSS) DNA methylation and gene expression between whole blood and uterus. Gene expression data are from GNF SymAtlas database<sup>3</sup>. Yellow bars represent promoter-tDMRs that display  $<40\%$  methylation in whole blood and  $> 60\%$  methylation in uterus. Blue bars represent promoter-tDMRs that display  $> 60\%$  methylation in whole blood and  $< 40\%$  methylation in uterus. 95% confidence intervals for the mean log ratios were calculated by bootstrapping.

|            | Motif                                                                               | Tissue           | Differential from somatic tissues | Significance |
|------------|-------------------------------------------------------------------------------------|------------------|-----------------------------------|--------------|
| TFAP2A     |    | Whole blood      | +                                 | 0.00043      |
| Pax5       |    | Sperm            | +                                 | 0.00001      |
|            |                                                                                     | CD8+ T cells     | +                                 | 0.00006      |
| Ev1        |    | Prostate         | +                                 | 0.00057      |
| FOXL1      |    | CD8+ T cells     | +                                 | 0.00016      |
|            |                                                                                     | CD4+ T cells     | +                                 | 0.00024      |
|            |                                                                                     | Sperm            | -                                 | 0.00075      |
| Klf4       |    | Sperm            | +                                 | <0.00001     |
|            |                                                                                     | Skeletal muscle  | +                                 | 0.00004      |
|            |                                                                                     | Prostate         | +                                 | 0.00012      |
|            |                                                                                     | Placenta         | +                                 | 0.00068      |
|            |                                                                                     | CD4+ T cells     | -                                 | 0.0008       |
| FOX11      |    | B cells          | -                                 | 0.0002       |
| TCF1       |    | Skeletal muscle  | -                                 | 0.00063      |
| Foxa2      |    | Sperm            | +                                 | 0.00031      |
| NHLH1      |    | Uterus           | -                                 | 0.00004      |
| IRF1       |    | Sperm            | +                                 | 0.00013      |
|            |                                                                                     | Prostate         | -                                 | 0.00086      |
| MEF2A      |    | Sperm            | -                                 | <0.00001     |
|            |                                                                                     | Liver            | -                                 | 0.00031      |
| ZNF42_5-13 |    | Uterus           | -                                 | 0.00001      |
| MAX        |    | Sperm            | +                                 | 0.00086      |
| MYC-MAX    |    | B cells          | +                                 | 0.00047      |
| Pax4       |    | Cervix           | +                                 | 0.00039      |
| Pbx        |    | Skeletal muscle  | -                                 | 0.00019      |
|            |                                                                                     | B cells          | +                                 | 0.00039      |
|            |                                                                                     | Uterus           | -                                 | 0.0008       |
| RXR-VDR    |  | Lung             | +                                 | <0.00001     |
| SP1        |  | Uterus           | -                                 | 0.00009      |
|            |                                                                                     | Cervix           | +                                 | 0.00011      |
|            |                                                                                     | B cells          | +                                 | 0.00012      |
|            |                                                                                     | Pancreas         | -                                 | 0.00025      |
| SP1B       |  | GM6990 cell line | -                                 | <0.00001     |
|            |                                                                                     | Skeletal muscle  | +                                 | 0.00013      |
| SRF        |  | B cells          | -                                 | 0.00098      |
| SRY        |  | Liver            | -                                 | 0.00038      |
| Stat       |  | Sperm            | +                                 | 0.00022      |
|            |                                                                                     | Uterus           | -                                 | 0.00024      |
| TCF11-MafG |  | Uterus           | +                                 | 0.00086      |
| HAND1-TCF3 |  | Liver            | -                                 | 0.00002      |
| USF1       |  | GM6990 cell line | -                                 | 0.00052      |
| REL        |  | GM6990 cell line | -                                 | 0.00053      |
| cEBP       |  | GM6990 cell line | -                                 | 0.00038      |
| NFKB1      |  | Uterus           | -                                 | 0.00012      |
|            |                                                                                     | Cervix           | +                                 | 0.0003       |
| TBP        |  | GM6990 cell line | -                                 | 0.00007      |
|            |                                                                                     | Whole blood      | -                                 | 0.00007      |
|            |                                                                                     | CD4+ T cells     | +                                 | 0.00016      |
|            |                                                                                     | Colon            | -                                 | 0.00044      |
|            |                                                                                     | Prostate         | +                                 | 0.00092      |
| Spz1       |  | Pancreas         | -                                 | 0.00001      |
|            |                                                                                     | Sperm            | +                                 | 0.00072      |
|            |                                                                                     | Prostate         | -                                 | 0.00078      |
| ESR1       |  | Uterus           | -                                 | 0.00022      |
| HNF4       |  | GM6990 cell line | -                                 | 0.00029      |
|            |                                                                                     | Skeletal muscle  | +                                 | 0.00041      |
|            |                                                                                     | Pancreas         | -                                 | 0.00075      |
| MafB       |  | Uterus           | -                                 | 0.00049      |
| Macho-1    |  | CD8+ T cells     | +                                 | 0.00051      |
| Bapx1      |  | Lung             | -                                 | 0.00038      |

**Supplementary Figure 9 (previous page).** Complete list of motifs from the JASPAR CORE database which are significantly over-represented in promoter tDMRs ( $p \leq 0.001$ , simulations indicate a false discovery rate  $<10\%$  at this threshold). We compared hyper- and hypo-methylated promoter tDMRs from each tissue in this study with equal-sized sets of non-tDMR promoters with matching distributions of CpG dinucleotide frequencies. For each promoter, we scanned each of the JASPAR motifs using the nmscan algorithm from NestedMICA 0.8.0, and recorded the highest score for each motif in each promoter. For each motif, we then compared each tDMR set with its corresponding non-tDMR set, looking for significant differences in the distribution of motif scores. Significance was assessed empirically by randomly resampling promoters into the tDMR and non-tDMR categories.

## References

1. Eckhardt, F. et al. DNA methylation profiling of human chromosomes 6, 20 and 22. *Nat. Genet.* 38, 1378-1385 (2006).
2. Weber, M. et al. Distribution, silencing potential and evolutionary impact of promoter DNA methylation in the human genome. *Nat. Genet.* 39, 457-466 (2007).
3. Su, A.I. et al. A gene atlas of the mouse and human protein-encoding transcriptomes. *Proc. Natl. Acad. Sci. USA* 101, 6062-6067 (2004).
